# Supplementary material for: Identification of Distinct Psychosis Biotypes Using Brain-Based Biomarkers
Source: Atypon-hosted journal article supplement (doi:10.1176/appi.ajp.2015.14091200), 2015-12-10

## **Supplementary Tables and Figures**

Table S1. Demographics by Biotype

Table S2. Concomitant Medications

Table S3. PCA Loadings

Table S4. TwoStep Cluster Results

Table S5. Discriminant Function Loadings for Cognitive Control and Sensorimotor Reactivity

Table S6. Jackknife Classification Results

Table S7. Clinical Characteristics by DSM Diagnosis

Table S8. Regions of Gray Matter Volume Reduction in Probands and Relatives

Figure S1. Biotype Creation Flow Diagram

Figure S2. Gap Statistic Results

Figure S3. Biotypes versus DSM Scatter

Figure S4. Relatives by Diagnosis on Cognitive Control and Sensorimotor Reactivity

Supplementary Table 1. Demographics

|                                  | Proband by Biotype |                |                | Relatives by Proband Biotype |                |                | Healthy<br>(n=279) |
|----------------------------------|--------------------|----------------|----------------|------------------------------|----------------|----------------|--------------------|
|                                  | 1<br>(n=198)       | 2<br>(n=235)   | 3<br>(n=278)   | 1<br>(n=228)                 | 2<br>(n=277)   | 3<br>(n=359)   |                    |
| <b>Age mean (SD)</b>             | 37.4<br>(13.5)     | 35.8<br>(11.8) | 35.2<br>(12.4) | 40.1<br>(15.3)               | 41.0<br>(15.8) | 42.0<br>(15.9) | 36.5<br>(12.7)     |
| <b>Female %</b>                  | 47.5               | 51.9           | 46.8           | 64.0                         | 67.9           | 67.4           | 53.8               |
| <b>Hispanic %</b>                | 11.1               | 9.4            | 5.4            | 13.6                         | 8.7            | 6.1            | 8.5                |
| <b>Race %</b>                    |                    |                |                |                              |                |                |                    |
| African American                 | 50.5               | 32.3           | 28.1           | 48.7                         | 28.2           | 22.0           | 28.8               |
| Native American                  | 0.5                | 0.0            | 0.0            | 1.3                          | 0.0            | 0.0            | 0.7                |
| Asian                            | 1.0                | 3.4            | 1.8            | 0.4                          | 2.2            | 1.4            | 5.5                |
| White                            | 42.4               | 60.            | 65.1           | 46.1                         | 67.5           | 71.6           | 61.7               |
| Mixed                            | 3.0                | 1.3            | 3.6            | 0.9                          | 1.1            | 2.5            | 1.3                |
| Other                            | 2.5                | 2.1            | 1.4            | 2.6                          | 1.1            | 2.5            | 2.0                |
| Native Hawaiian                  | 0.0                | 0.0            | 0.0            | 0.0                          | 0.0            | 0.0            | 0.2                |
| <b>Marital Status %</b>          |                    |                |                |                              |                |                |                    |
| Never married                    | 70.2               | 66.4           | 66.2           | 46.5                         | 41.5           | 39.8           | 54.9               |
| Ever married                     | 29.3               | 33.2           | 33.8           | 51.8                         | 56.7           | 59.1           | 40.5               |
| Unknown                          | 0.5                | 0.4            | 0.0            | 1.8                          | 1.8            | 1.1            | 4.6                |
| <b>Education years mean (SD)</b> | 12.3<br>(2.1)      | 13.0<br>(2.3)  | 14.0<br>(2.7)  | 13.5<br>(2.7)                | 13.8<br>(2.5)  | 14.6<br>(2.7)  | 14.8<br>(2.5)      |
| <b>Hollingshead % (Family)</b>   |                    |                |                |                              |                |                |                    |
| Class I                          | 4.0                | 5.1            | 6.1            | 3.1                          | 2.9            | 7.0            | 6.5                |
| Class II                         | 15.2               | 23.0           | 31.7           | 11.0                         | 20.2           | 25.6           | 21.1               |
| Class III                        | 26.8               | 28.1           | 29.1           | 31.1                         | 30.3           | 29.5           | 34.0               |
| Class IV                         | 24.2               | 20.4           | 19.1           | 27.6                         | 25.3           | 23.1           | 20.5               |
| Class V                          | 13.1               | 11.1           | 5.4            | 11.8                         | 10.1           | 5.6            | 5.2                |
| Unknown                          | 16.7               | 12.3           | 8.6            | 15.4                         | 11.2           | 9.2            | 12.6               |
| <b>Handedness</b>                |                    |                |                |                              |                |                |                    |
| Left                             | 14.7               | 11.1           | 12.6           | 13.2                         | 10.1           | 8.6            | 9.6                |
| Right                            | 81.3               | 86.4           | 84.2           | 83.3                         | 86.3           | 89.1           | 82.6               |
| Both                             | 2.5                | 1.3            | 2.2            | 1.8                          | 1.8            | 0.8            | 1.3                |
| Unknown                          | 1.5                | 1.3            | 1.1            | 1.8                          | 1.8            | 1.4            | 6.5                |

Supplementary Table 2. Concomitant Medications

| Medication status, n (%)                           | Proband by Biotype |               |               | Relatives by Proband Biotype |               |               |
|----------------------------------------------------|--------------------|---------------|---------------|------------------------------|---------------|---------------|
|                                                    | 1<br>(n=194)       | 2<br>(n=235)  | 3<br>(n=275)  | 1<br>(n=218)                 | 2<br>(n=273)  | 3<br>(n=348)  |
| <b>Off Any Medication</b>                          | 0<br>(0.0)         | 9<br>(3.8)    | 10<br>(3.6)   | 66<br>(30.3)                 | 82<br>(30.0)  | 95<br>(27.3)  |
| <b>Off Psychotropic Medications</b>                | 2<br>(1.0)         | 15<br>(6.4)   | 22<br>(8.0)   | 153<br>(70.2)                | 193<br>(70.7) | 245<br>(70.4) |
| <b>On &gt;1 Psychotropic Medication</b>            | 165<br>(85.1)      | 182<br>(77.5) | 199<br>(72.4) | 39<br>(17.9)                 | 42<br>(15.4)  | 44<br>(12.6)  |
| <b>Antipsychotics (Any)</b>                        | 181<br>(93.3)      | 203<br>(86.4) | 217<br>(78.9) | 28<br>(12.8)                 | 25<br>(9.2)   | 26<br>(7.5)   |
| First Generation                                   | 30<br>(15.5)       | 17<br>(7.2)   | 23<br>(8.4)   | 3<br>(1.4)                   | 4<br>(1.5)    | 1<br>(0.3)    |
| Second Generation                                  | 151<br>(77.8)      | 185<br>(78.7) | 194<br>(70.6) | 25<br>(11.5)                 | 21<br>(7.7)   | 25<br>(7.2)   |
| <b>Mood Stabilizers (Any)</b>                      | 84<br>(43.3)       | 104<br>(44.3) | 131<br>(47.6) | 20<br>(9.2)                  | 21<br>(7.7)   | 22<br>(6.3)   |
| Lithium                                            | 19<br>(9.8)        | 31<br>(13.2)  | 41<br>(14.9)  | 3<br>(1.4)                   | 7<br>(2.6)    | 6<br>(1.7)    |
| Anticonvulsants                                    | 65<br>(33.5)       | 73<br>(31.1)  | 90<br>(32.7)  | 17<br>(7.8)                  | 14<br>(5.1)   | 16<br>(4.6)   |
| <b>Antidepressants (Any)</b>                       | 85<br>(43.8)       | 108<br>(46.0) | 125<br>(45.5) | 37<br>(17.0)                 | 56<br>(20.5)  | 69<br>(19.8)  |
| SSRIs, SNRIs                                       | 53<br>(27.3)       | 65<br>(27.7)  | 71<br>(25.8)  | 29<br>(13.3)                 | 41<br>(15.0)  | 49<br>(14.1)  |
| Tricyclic                                          | 1<br>(0.5)         | 8<br>(3.4)    | 3<br>(1.1)    | 2<br>(0.9)                   | 2<br>(0.7)    | 2<br>(0.6)    |
| MAO Inhibitors                                     | 0<br>(0.0)         | 0<br>(0.0)    | 0<br>(0.0)    | 0<br>(0.0)                   | 0<br>(0.0)    | 0<br>(0.0)    |
| Miscellaneous                                      | 31<br>(16.0)       | 35<br>(14.9)  | 51<br>(18.6)  | 6<br>(2.8)                   | 13<br>(4.8)   | 18<br>(5.2)   |
| <b>Anxiolytics/Sedatives/Hypnotics</b>             | 57<br>(29.4)       | 66<br>(28.1)  | 67<br>(24.4)  | 17<br>(7.8)                  | 23<br>(8.4)   | 38<br>(10.9)  |
| <b>Anticholinergic/Antiparkinsonian</b>            | 46<br>(23.7)       | 23<br>(9.8)   | 33<br>(12.0)  | 4<br>(1.8)                   | 3<br>(1.1)    | 2<br>(0.6)    |
| <b>Stimulants</b>                                  | 12<br>(6.2)        | 10<br>(4.3)   | 25<br>(9.1)   | 9<br>(4.1)                   | 7<br>(2.6)    | 7<br>(2.0)    |
| <b>Miscellaneous Psychotropic/Centrally Active</b> | 2<br>(1.0)         | 8<br>(3.4)    | 7<br>(2.6)    | 3<br>(1.4)                   | 5<br>(1.8)    | 3<br>(0.9)    |

Concomitant medication data are presented based on subjects' reports and available clinical information. Missing concomitant medication data, (n) %: Proband: Biotype 1, 4 (2.0); Biotype 3, 3 (1.1); Relatives: Biotype 1, 10 (4.4); Biotype 2, 4 (1.4); Biotype 3, 11 (3.1)

**Supplementary Table 3. PCA Loadings**

| <b>ERP Variables Pattern Matrix</b>     |              |              |                  |                  |             |
|-----------------------------------------|--------------|--------------|------------------|------------------|-------------|
|                                         | Component    |              |                  |                  |             |
|                                         | <b>N100</b>  | <b>P300</b>  | <b>Paired S2</b> | <b>Intrinsic</b> | <b>P200</b> |
| Paired Stimuli - S1 (N100 ERP)          | <b>-.819</b> | .186         | .247             | .033             | .015        |
| Oddball - Targets2 (N100 ERP)           | <b>-.801</b> | -.174        | -.154            | .122             | .258        |
| Oddball - Standards (N100 ERP)          | <b>-.779</b> | -.200        | -.086            | .080             | .293        |
| Paired Stimuli – S1 (low early latency) | <b>.717</b>  | -.148        | -.179            | .135             | .243        |
| Oddball - Targets1 (low 20-100ms)       | <b>.669</b>  | .253         | .070             | .078             | -.131       |
| Oddball - Standards (beta 20-100ms)     | <b>.530</b>  | .170         | .054             | .336             | -.002       |
| Oddball - Standards (low 30-480ms)      | <b>.449</b>  | .430         | .053             | .118             | .169        |
| Oddball - Targets2 (low 140-280ms)      | -.016        | <b>.838</b>  | -.014            | -.076            | .085        |
| Oddball - Targets2 (low 280-400ms)      | .029         | <b>.784</b>  | -.077            | -.098            | .071        |
| Oddball - Targets1 (P3a ERP)            | .000         | <b>-.679</b> | .063             | .030             | .042        |
| Oddball - Targets1 (low 190-440ms)      | .166         | <b>.652</b>  | .040             | -.024            | .037        |
| Oddball - Targets2 (beta 180-240ms)     | -.021        | <b>.544</b>  | -.048            | .324             | -.003       |
| Oddball - Targets1 (beta 140-230ms)     | .070         | <b>.488</b>  | -.001            | .338             | .054        |
| Paired Stimuli - S2 (late ERP)          | .058         | -.019        | <b>.831</b>      | -.053            | .132        |
| Paired Stimuli - preS2                  | -.113        | -.083        | <b>.723</b>      | .104             | -.199       |
| Paired Stimuli - S2 (P50 ERP)           | -.157        | -.076        | <b>.698</b>      | .294             | -.062       |
| Paired Stimuli - S2 (P200 ERP)          | .101         | -.047        | <b>.687</b>      | -.144            | .375        |
| Paired Stimuli - S2 (N100 ERP)          | -.073        | -.036        | <b>.653</b>      | .116             | .426        |
| Paired Stimuli - S1 (N200 ERP)          | .027         | .064         | <b>.576</b>      | -.099            | -.014       |
| Oddball - Standards (gamma 480-520ms)   | -.086        | .007         | .121             | <b>.666</b>      | -.147       |
| Paired Stimuli – S2 (beta late)         | -.021        | .011         | -.010            | <b>.615</b>      | -.001       |
| Paired Stimuli - preS1 (gamma)          | -.069        | -.127        | .055             | <b>.566</b>      | -.169       |
| Oddball – Targets2 (gamma 20-70ms)      | .129         | .071         | -.025            | <b>.515</b>      | .035        |
| Oddball – Standards (beta 30-70ms)      | .211         | .100         | .061             | <b>.497</b>      | .065        |
| Oddball – Standards (beta 230-270ms)    | .077         | .324         | -.065            | <b>.454</b>      | .105        |
| Paired Stimuli – S1 (beta early)        | .424         | -.111        | -.110            | <b>.450</b>      | .174        |
| Oddball – Standards (P200 ERP)          | .013         | .118         | .176             | -.026            | <b>.754</b> |
| Oddball – Targets2 (P200 ERP)           | -.445        | -.094        | -.013            | .103             | <b>.685</b> |
| Paired Stimuli - S1 (P200 ERP)          | .410         | -.075        | .248             | -.245            | <b>.597</b> |
| Oddball Targets2 (N200 ERP)             | -.357        | .416         | -.060            | -.115            | <b>.575</b> |
| Paired Stimuli – S1 (low midlatency)    | .376         | -.020        | -.257            | .077             | <b>.433</b> |

| <b>Stop Signal Task Pattern Matrix</b> |                         |
|----------------------------------------|-------------------------|
|                                        | <b>Stop Signal Task</b> |
| Proportion Errors                      | -.860                   |
| Go RT Difference                       | .860                    |

| <b>Saccade Tasks Pattern Matrix</b> |                        |                           |
|-------------------------------------|------------------------|---------------------------|
|                                     | Component              |                           |
|                                     | <b>Saccade Latency</b> | <b>Antisaccade Errors</b> |
| Antisaccade Error Rate              | -.076                  | <b>.969</b>               |
| Antisaccade Error Latency           | <b>.663</b>            | <b>-.423</b>              |
| Prosaccade No Gap Latency           | <b>.894</b>            | -.035                     |
| Prosaccade Gap Latency              | <b>.880</b>            | -.062                     |
| Prosaccade Overlap Latency          | <b>.856</b>            | -.147                     |

Supplementary Table 4: TwoStep Cluster Results for Determining Number of Clusters. Red shows the solution with the lowest Schwarz's Bayesian Information Criterion (BIC) and the greatest separation between clusters (3 cluster row).

| Number of Clusters | (BIC)           | BIC Change <sup>a</sup> | Ratio of BIC Changes <sup>b</sup> | Ratio of Distance Measures <sup>c</sup> |
|--------------------|-----------------|-------------------------|-----------------------------------|-----------------------------------------|
| 1                  | 2303.222        |                         |                                   |                                         |
| 2                  | 2230.353        | -72.868                 | 1.000                             | 1.286                                   |
| <b>3</b>           | <b>2197.199</b> | <b>-33.155</b>          | <b>.455</b>                       | <b>1.533</b>                            |
| 4                  | 2212.269        | 15.071                  | -.207                             | 1.373                                   |
| 5                  | 2251.915        | 39.646                  | -.544                             | 1.062                                   |
| 6                  | 2295.391        | 43.476                  | -.597                             | 1.507                                   |
| 7                  | 2359.771        | 64.379                  | -.883                             | 1.018                                   |
| 8                  | 2424.884        | 65.114                  | -.894                             | 1.062                                   |
| 9                  | 2492.359        | 67.474                  | -.926                             | 1.007                                   |
| 10                 | 2560.107        | 67.748                  | -.930                             | 1.117                                   |

- a. Changes are from the previous number of clusters.
- b. Ratios of changes are relative to the two-cluster solution.
- c. Ratios of distance measures are based on the current number of clusters against the previous number of clusters.

| <b>Biomarker Composite Loadings on Discriminant Functions</b> |                          |                                |                           |                  |                  |
|---------------------------------------------------------------|--------------------------|--------------------------------|---------------------------|------------------|------------------|
|                                                               | Component                |                                | Three SZ Cases by Biotype |                  |                  |
| <b>Biomarker Composites</b>                                   | <b>Cognitive Control</b> | <b>Sensorimotor Reactivity</b> | <b>Biotype-1</b>          | <b>Biotype-2</b> | <b>Biotype-3</b> |
| BACS                                                          | <b>.82</b>               | .05                            | -3.3                      | -2.8             | -1.0             |
| Stop Signal Task                                              | <b>.33</b>               | .03                            | -2.0                      | 0.1              | 0.6              |
| Antisaccade Errors                                            | <b>-.24</b>              | .09                            | 3.8                       | 3.0              | 0.8              |
| EEG Intrinsic Activity                                        | -.01                     | <b>.69</b>                     | -0.8                      | 0.3              | -1.3             |
| ERP N100 Response                                             | .12                      | <b>.58</b>                     | -1.8                      | -0.8             | -0.2             |
| ERP Paired S2 Response                                        | .02                      | <b>-.48</b>                    | 1.2                       | -1.4             | 0.3              |
| ERP P300 Response                                             | .14                      | <b>.47</b>                     | -2.1                      | -0.5             | -0.1             |
| ERP P200 Response                                             | -.14                     | <b>.32</b>                     | -0.7                      | -0.6             | -0.9             |
| Saccade Latency                                               | -.18                     | <b>-.20</b>                    | 2.0                       | -1.2             | 0.4              |
|                                                               |                          |                                |                           |                  |                  |
| Cognitive Control                                             |                          |                                | -3.6                      | -2.0             | 1.2              |
| Sensorimotor Reactivity                                       |                          |                                | -2.2                      | 0.8              | -1.1             |

**Supplementary Table 5. Discriminant Function Loadings.** The loadings of the nine biomarker composite variables on the two discriminant functions are shown under the ‘Component’ column. Also displayed are three examples of schizophrenia (SZ) cases that fell into different Biotypes. The effect size differentiation on each of the biomarker composites for each case is shown. The bottom two rows show the ‘Cognitive Control’ and ‘Sensorimotor Reactivity’ values (in standard score units) for the three cases. These values can be translated to the bivariate scatter plots in Supplementary Figure 3. Brief Assessment of Cognition in Schizophrenia (BACS); Electroencephalography (EEG); Event-Related Potential (ERP).

**Predicted Biotype Membership**

| <b>Original Biotype Membership</b> | <b>1</b>     | <b>2</b>     | <b>3</b>     | <b>Total Cases</b> |
|------------------------------------|--------------|--------------|--------------|--------------------|
| <b>1</b>                           | 170<br>(86%) | 23<br>(12%)  | 5<br>(2%)    | 198<br>(100%)      |
| <b>2</b>                           | 10<br>(4%)   | 213<br>(91%) | 12<br>(5%)   | 235<br>(100%)      |
| <b>3</b>                           | 3<br>(1%)    | 11<br>(4%)   | 264<br>(95%) | 278<br>(100%)      |

**Predicted DSM Diagnosis Membership**

| <b>Original DSM Dx Membership</b> | <b>SZ</b>    | <b>SZAff</b> | <b>BDP</b>   | <b>Total Cases</b> |
|-----------------------------------|--------------|--------------|--------------|--------------------|
| <b>SZ</b>                         | 162<br>(52%) | 79<br>(25%)  | 71<br>(23%)  | 312<br>(100%)      |
| <b>SZAff</b>                      | 72<br>(41%)  | 46<br>(27%)  | 55<br>(32%)  | 173<br>(100%)      |
| <b>BDP</b>                        | 54<br>(24%)  | 61<br>(27%)  | 111<br>(49%) | 226<br>(100%)      |

Supplementary Table 6. Jackknife Results. Schizophrenia (SZ); Schizoaffective (SZAff); Bipolar Disorder with Psychosis (BDP).

Supplementary Table 7. Clinical Characteristics by DSM. Schizophrenia (SZ); Schizoaffective (SZAff); Bipolar Disorder with Psychosis (BDP)

| Clinical Characteristics                                                                        | DSM Diagnosis   |                 |                 | Statistics               |         |                     |
|-------------------------------------------------------------------------------------------------|-----------------|-----------------|-----------------|--------------------------|---------|---------------------|
|                                                                                                 | SZ              | SZAff           | BDP             | (df)                     | Value   | p                   |
| <b>Probands Biotype, (%)</b>                                                                    |                 |                 |                 |                          |         |                     |
| 1                                                                                               | 58.6            | 21.2            | 20.2            | $\chi^2(2)$              | 25.95   | <.001 <sup>a</sup>  |
| 2                                                                                               | 46.0            | 26.8            | 27.2            | $\chi^2(2)$              | 3.50    | .17                 |
| 3                                                                                               | 31.7            | 24.5            | 43.9            | $\chi^2(2)$              | 36.46   | <.001 <sup>b</sup>  |
|                                                                                                 |                 |                 |                 |                          |         |                     |
| <b>Schizo-Bipolar Scale, mean (SD)</b>                                                          | 7.9<br>(1.2)    | 5.1<br>(1.5)    | 1.1<br>(1.1)    | F(2,687)                 | 1943.63 | p<.001 <sup>c</sup> |
|                                                                                                 |                 |                 |                 |                          |         |                     |
| <b>Probands Clinical Symptom Ratings, mean (SD)</b>                                             |                 |                 |                 |                          |         |                     |
| PANSS Positive Subscale                                                                         | 16.7<br>(5.8)   | 17.9<br>(5.2)   | 12.9<br>(3.9)   | F(2,692)                 | 51.71   | <.001 <sup>d</sup>  |
| PANSS Negative Subscale                                                                         | 16.7<br>(6.0)   | 15.8<br>(5.0)   | 12.0<br>(3.9)   | F(2,692)                 | 56.92   | <.001 <sup>e</sup>  |
| MADRS                                                                                           | 8.2<br>(7.9)    | 14.7<br>(10.3)  | 10.2<br>(9.3)   | F(2,687)                 | 28.70   | <.001 <sup>f</sup>  |
| Young Mania Rating Scale                                                                        | 5.5<br>(5.8)    | 7.1<br>(6.5)    | 5.8<br>(6.7)    | F(2,688)                 | 3.60    | .03 <sup>g</sup>    |
|                                                                                                 |                 |                 |                 |                          |         |                     |
| <b>Birchwood Social Functioning Scale, mean (SD)</b><br><b>(Healthy, Mean = 154.8; SD=17.8)</b> |                 |                 |                 |                          |         |                     |
| Probands                                                                                        | 120.8<br>(24.4) | 118.4<br>(25.1) | 134.3<br>(22.6) | F(3,885)                 | 120.30  | <.001 <sup>h</sup>  |
| Relatives                                                                                       | 147.0<br>(21.4) | 141.8<br>(23.4) | 150.3<br>(21.6) | F(3,979)                 | 17.31   | <.001 <sup>i</sup>  |
|                                                                                                 |                 |                 |                 |                          |         |                     |
| <b>Relatives Diagnoses, (%)</b>                                                                 |                 |                 |                 |                          |         |                     |
| Axis I Psychosis                                                                                | 11.5            | 14.8            | 8.6             | $\chi^2(2)$              | 4.73    | .09                 |
| Axis II: Cluster A and/or B Personality Disorders                                               | 9.9             | 11.7            | 10.0            | $\chi^2(2)$              | 0.62    | .73                 |
| Psychosis-Related Diagnoses (Axis I Psychosis + Axis II/Cluster A,B, combined)*                 | 21.1            | 25.7            | 18.3            | $\chi^2(2)$ <sup>h</sup> | 4.10    | .13                 |

\*Axis I Psychosis and % Axis II/Cluster A, B combined % do not exactly sum to % Psychosis and Psychosis-Related illnesses because some relatives have both Axis I Psychosis and Axis II/Cluster A, B. In such cases they are counted once.

<sup>a</sup>Yates Corrected pair-wise chi square: SZ>SZAff,  $\chi^2(1)=7.86$ , p=.005; SZ>BDP,  $\chi^2(1)=23.22$ , p<.001

<sup>b</sup>Yates Corrected pair-wise chi square: BDP>SZ,  $\chi^2(1)=35.52$ , p<.001; BDP >SZAff,  $\chi^2(1)=7.88$ , p=.005; SZ>SZAff,  $\chi^2(1)=5.79$ , p=.02

<sup>c</sup>Tukey HSD: SZ>SZAff (p<.001) and BDP (p<.001); SZAff>BDP (p<.001)

<sup>d</sup>Tukey HSD: BDP<SZ (p<.001) and SZAff (p<.001); SZAff>SZ (p=.04)

<sup>e</sup>Tukey HSD: BDP<SZ (p<.001) and SZAff (p<.001)

<sup>f</sup>Tukey HSD: SZAff>SZ (p<.001) and BDP (p<.001); BDP > SZ (p=.03)

<sup>g</sup>Tukey HSD: SZAff>SZ (p=.02)

<sup>h</sup>Tukey HSD: SZ<BDP (p<.001) and Healthy (p<.001); SZAff<BDP (p<.001) and Healthy (p<.001); BDP<Healthy (p<.001)

<sup>i</sup>Tukey HSD: SZ<Healthy (p<.001); SZAff<BDP (p<.001) and Healthy (p<.001); BDP<Healthy (p=0.01)



**Supplementary Table 8. Regions of gray matter volume reduction in probands and relatives categorized by Biotype contrasted with healthy subjects**

| Group Comparison                                                                    | Brain Region            | Brodman Area         | Gray Matter Volume (Voxels) Left / Right | Maximum <i>t</i> (Talairach coordinates: x, y, z) Left / Right * | Effect size Left / Right †         |             |
|-------------------------------------------------------------------------------------|-------------------------|----------------------|------------------------------------------|------------------------------------------------------------------|------------------------------------|-------------|
| <b>Gray matter volume reductions in Biotype proband groups vs. healthy subjects</b> |                         |                      |                                          |                                                                  |                                    |             |
| <b>Healthy – Biotype1 Probands</b>                                                  | <i>Frontal</i>          |                      |                                          |                                                                  |                                    |             |
|                                                                                     | Inferior Frontal Gyrus  | 9, 10, 11, 13, 44,   | 6667 / 7081                              | 9.1 (-39, 25, -1) / 10.3 (42, 22, -4)                            | 0.94 / 1.06                        |             |
|                                                                                     | Middle Frontal Gyrus    | 6, 8, 9, 10, 11, 46, | 4830 / 6904                              | 9.4 (-30, 37, -13) / 10.0 (33, 33, -16)                          | 0.97 / 1.03                        |             |
|                                                                                     | Medial Frontal Gyrus    | 6, 8, 9, 10, 11, 25, | 6193 / 6133                              | 10.8 (-1, 33, -14) / 11.0 (1, 36, -13)                           | 1.11 / 1.13                        |             |
|                                                                                     | Superior Frontal Gyrus  | 6, 8, 9, 10, 11      | 5511 / 6015                              | 8.6 (-30, 42, -15) / 8.2 (12, 55, -9)                            | 0.89 / 0.85                        |             |
|                                                                                     | Precentral Gyrus        | 6, 9, 13, 43, 44     | 4593 / 4770                              | 7.8 (-42, 3, 7) / 8.3 (45, 5, 9)                                 | 0.81 / 0.86                        |             |
|                                                                                     | Paracentral Lobule      | 4, 5, 6, 31          | 593 / 800                                | 6.6 (-3, -11, 46) / 8.4 (6, -15, 44)                             | 0.68 / 0.87                        |             |
|                                                                                     | Rectal Gyrus            | 11                   | 237 / 148                                | 9.3 (-1, 33, -19) / 9.2 (3, 34, -21)                             | 0.96 / 0.95                        |             |
|                                                                                     | Orbital Gyrus           | 11, 47               | 148 / 89                                 | 8.9 (-3, 40, -20) / 8.6 (4, 44, -19)                             | 0.92 / 0.89                        |             |
|                                                                                     | <i>Cingulate</i>        |                      |                                          |                                                                  |                                    |             |
|                                                                                     | Cingulate Gyrus         | 23, 24, 31, 32       | 4800 / 4533                              | 8.9 (-3, 22, 28) / 9.8 (9, 8, 40)                                | 0.92 / 1.01                        |             |
|                                                                                     | Anterior Cingulate      | 10, 24, 25, 32, 33   | 2459 / 2578                              | 10.1 (-4, 39, -10) / 9.7 (3, 45, -6)                             | 1.04 / 1.00                        |             |
|                                                                                     | Posterior Cingulate     | 23, 29, 30, 31       | 1659 / 1244                              | 8.7 (-1, -60, 14) / 8.9 (4, -56, 17)                             | 0.90 / 0.92                        |             |
|                                                                                     | <i>Insula</i>           |                      |                                          |                                                                  |                                    |             |
|                                                                                     |                         |                      | 13, 22, 40, 41, 47                       | 3615 / 3437                                                      | 9.1 (-33, 20, 2) / 9.5 (36, 22, 2) | 0.94 / 0.98 |
|                                                                                     | <i>Temporal</i>         |                      |                                          |                                                                  |                                    |             |
|                                                                                     | Superior Temporal Gyrus | 13, 21, 22, 38, 39,  | 6756 / 6281                              | 8.7 (-33, 4, -13) / 8.3 (31, 7, -15)                             | 0.90 / 0.86                        |             |
|                                                                                     | Middle Temporal Gyrus   | 19, 20, 21, 22, 37,  | 5096 / 5570                              | 7.9 (-42, 5, -37) / 8.2 (58, 2, -18)                             | 0.82 / 0.85                        |             |
|                                                                                     | Parahippocampal Gyrus   | 19, 27, 28, 30, 34,  | 3378 / 3289                              | 9.5 (-27, -14, -21) / 8.9 (28, -16, -21)                         | 0.98 / 0.92                        |             |
|                                                                                     | Fusiform Gyrus          | 18, 19, 20, 36, 37   | 2163 / 2163                              | 7.1 (-25, -56, -9) / 7.1 (27, -50, -8)                           | 0.73 / 0.73                        |             |
| Inferior Temporal Gyrus                                                             | 19, 20, 21, 37          | 1659 / 1689          | 7.2 (-42, 0, -37) / 6.4 (42, 0, -35)     | 0.74 / 0.66                                                      |                                    |             |
| Uncus                                                                               | 20, 28, 34, 36, 38      | 1037 / 1007          | 8.3 (-28, 2, -20) / 8.5 (33, 2, -19)     | 0.86 / 0.88                                                      |                                    |             |
| Transverse Temporal                                                                 | 41, 42                  | 444 / 267            | 8.0 (-48, -26, 12) / 8.5 (58, -20, 13)   | 0.83 / 0.88                                                      |                                    |             |

***Parietal***

|                          |                       |             |                                        |             |
|--------------------------|-----------------------|-------------|----------------------------------------|-------------|
| Precuneus                | 7, 18, 19, 23, 31     | 3822 / 4652 | 8.3 (-1, -59, 20) / 8.7 (4, -59, 20)   | 0.86 / 0.90 |
| Inferior Parietal Lobule | 7, 39, 40             | 1126 / 2696 | 6.7 (-59, -38, 24) / 7.4 (55, -27, 22) | 0.69 / 0.77 |
| Postcentral Gyrus        | 1, 2, 3, 5, 7, 40, 43 | 1333 / 1570 | 6.7 (-50, -25, 15) / 8.2 (58, -22, 16) | 0.69 / 0.85 |
| Supramarginal Gyrus      | 40                    | 89 / 978    | 4.4 (-53, -39, 30) / 5.6 (43, -46, 37) | 0.46 / 0.58 |
| Superior Parietal Lobule | 5, 7                  | 296 / 385   | 4.7 (-16, -61, 60) / 4.5 (24, -52, 58) | 0.49 / 0.47 |
| Angular Gyrus            | 39                    | 0 / 296     | - / 5.5 (48, -55, 36)                  | - / 0.57    |

***Occipital***

|                          |                    |             |                                        |             |
|--------------------------|--------------------|-------------|----------------------------------------|-------------|
| Cuneus                   | 7, 17, 18, 19, 23, | 3911 / 4119 | 7.5 (-9, -62, 7) / 8.0 (13, -62, 7)    | 0.76 / 0.83 |
| Lingual Gyrus            | 17, 18, 19         | 2815 / 2726 | 6.7 (-4, -79, 3) / 7.4 (16, -61, 4)    | 0.69 / 0.77 |
| Middle Occipital Gyrus   | 18, 19, 37         | 2370 / 2667 | 5.9 (-34, -84, 14) / 6.9 (24, -92, 20) | 0.61 / 0.71 |
| Inferior Occipital Gyrus | 17, 18, 19         | 504 / 652   | 5.3 (-28, -94, -8) / 6.1 (27, -86, -7) | 0.55 / 0.63 |
| Superior Occipital Gyrus | 19, 39             | 30 / 178    | 4.5 (-30, -88, 22) / 5.3 (33, -86, 24) | 0.47 / 0.55 |

***Basal Ganglia***

|                   |   |           |                                        |             |
|-------------------|---|-----------|----------------------------------------|-------------|
| Caudate           | * | 444 / 593 | 5.5 (-4, 10, -6) / 6.1 (4, 10, -4)     | 0.57 / 0.63 |
| Clastrum          | * | 326 / 296 | 8.0 (-28, 19, 2) / 7.8 (30, 19, -1)    | 0.83 / 0.81 |
| Lentiform Nucleus | * | 89 / 119  | 5.7 (-22, -12, -6) / 5.7 (30, -18, 13) | 0.59 / 0.59 |

***Thalamus***

|  |   |             |                                      |             |
|--|---|-------------|--------------------------------------|-------------|
|  | * | 1333 / 1304 | 6.3 (-7, -13, 10) / 5.5 (9, -15, 12) | 0.65 / 0.57 |
|--|---|-------------|--------------------------------------|-------------|

***Cerebellum***

|                     |   |             |                                          |             |
|---------------------|---|-------------|------------------------------------------|-------------|
| Culmen              | * | 2815 / 3437 | 6.9 (-19, -56, -20) / 7.0 (18, -27, -15) | 0.71 / 0.72 |
| Declive             | * | 1867 / 2756 | 6.8 (-13, -62, -18) / 6.1 (13, -59, -18) | 0.70 / 0.63 |
| Inferior Semi-Lunar | * | 830 / 1274  | 4.9 (-3, -63, -36) / 5.7 (16, -73, -42)  | 0.51 / 0.59 |
| Uvula               | * | 385 / 919   | 4.8 (-3, -66, -33) / 5.1 (33, -62, -23)  | 0.50 / 0.53 |
| Tuber               | * | 0 / 415     | - / 4.8 (31, -57, -27)                   | - / 0.50    |
| Pyramis             | * | 119 / 385   | 3.7 (-27, -60, -29) / 4.5 (27, -60, -27) | 0.38 / 0.47 |
| Cerebellar Tonsil   | * | 119 / 385   | 4.0 (-3, -57, -36) / 4.4 (7, -57, -41)   | 0.41 / 0.45 |
| Uvula of Vermis     | * | 119 / 89    | 5.0 (0, -69, -33) / 4.9 (3, -66, -33)    | 0.52 / 0.51 |
| Declive of Vermis   | * | 59 / 119    | 4.0 (-1, -72, -15) / 4.4 (1, -69, -15)   | 0.41 / 0.46 |
| Culmen of Vermis    | * | 89 / 89     | 5.7 (-3, -61, 2) / 5.9 (6, -61, 1)       | 0.59 / 0.61 |

|                   |   |         |                                        |             |
|-------------------|---|---------|----------------------------------------|-------------|
| Fastigium         | * | 59 / 59 | 5.5 (-9, -55, -19) / 5.5 (9, -56, -19) | 0.57 / 0.57 |
| Pyramis of Vermis | * | 30 / 30 | 3.7 (0, -71, -30) / 3.1 (3, -71, -28)  | 0.38 / 0.32 |

**Healthy –  
Biotype2  
Probands**

***Frontal***

|                        |                       |             |                                        |             |
|------------------------|-----------------------|-------------|----------------------------------------|-------------|
| Inferior Frontal Gyrus | 6, 9, 10, 11, 13, 25, | 5926 / 6193 | 8.2 (-39, 19, -2) / 8.5 (43, 19, -5)   | 0.80 / 0.83 |
| Superior Frontal Gyrus | 6, 8, 9, 10, 11       | 5600 / 5896 | 7.1 (-27, 52, -4) / 7.1 (10, 57, -1)   | 0.69 / 0.69 |
| Middle Frontal Gyrus   | 6, 8, 9, 10, 11, 46,  | 5096 / 5719 | 7.4 (-30, 36, -14) / 6.6 (33, 34, -16) | 0.72 / 0.64 |
| Medial Frontal Gyrus   | 6, 8, 9, 10, 11, 25,  | 5333 / 5570 | 8.2 (-12, 47, 16) / 7.5 (4, 55, 15)    | 0.80 / 0.73 |
| Precentral Gyrus       | 6, 9, 13, 42, 43, 44  | 2548 / 3585 | 6.9 (-46, -11, 9) / 7.5 (43, 3, 8)     | 0.67 / 0.73 |
| Paracentral Lobule     | 4, 5, 6, 31           | 296 / 533   | 4.9 (-7, -24, 43) / 6.6 (9, -18, 44)   | 0.48 / 0.64 |
| Rectal Gyrus           | 11                    | 237 / 148   | 5.8 (-4, 32, -21) / 5.5 (3, 24, -19)   | 0.56 / 0.53 |
| Orbital Gyrus          | 11                    | 148 / 119   | 7.4 (-4, 43, -21) / 5.9 (3, 51, -20)   | 0.72 / 0.57 |

***Cingulate***

|                     |                    |             |                                      |             |
|---------------------|--------------------|-------------|--------------------------------------|-------------|
| Cingulate Gyrus     | 23, 24, 31, 32     | 4030 / 4178 | 6.0 (-6, 23, 28) / 7.5 (9, -24, 37)  | 0.58 / 0.73 |
| Anterior Cingulate  | 10, 24, 25, 32, 33 | 2548 / 2193 | 7.6 (-9, 48, -2) / 7.2 (7, 45, -5)   | 0.74 / 0.70 |
| Posterior Cingulate | 23, 29, 30, 31     | 1659 / 1333 | 7.1 (-9, -58, 11) / 7.5 (10, -55, 8) | 0.69 / 0.73 |

***Insula***

|  |            |             |                                   |             |
|--|------------|-------------|-----------------------------------|-------------|
|  | 13, 22, 41 | 3467 / 3763 | 8.4 (-36, 18, 1) / 8.3 (43, 3, 3) | 0.82 / 0.81 |
|--|------------|-------------|-----------------------------------|-------------|

***Temporal***

|                         |                     |             |                                          |             |
|-------------------------|---------------------|-------------|------------------------------------------|-------------|
| Superior Temporal Gyrus | 13, 21, 22, 38, 39, | 6993 / 6311 | 8.2 (-55, -17, 9) / 8.1 (52, -1, 3)      | 0.80 / 0.79 |
| Middle Temporal Gyrus   | 19, 20, 21, 22, 37, | 5719 / 5630 | 7.3 (-56, -11, -10) / 6.9 (62, -35, 3)   | 0.71 / 0.67 |
| Parahippocampal Gyrus   | 19, 27, 28, 30, 34, | 3378 / 3259 | 6.8 (-24, -44, -10) / 6.5 (24, -48, -8)  | 0.67 / 0.63 |
| Fusiform Gyrus          | 18, 19, 20, 37      | 2607 / 1985 | 6.9 (-27, -54, -9) / 6.8 (24, -62, -8)   | 0.67 / 0.66 |
| Inferior Temporal Gyrus | 19, 20, 21, 37      | 1807 / 1600 | 5.8 (-39, 0, -37) / 5.7 (39, -19, -29)   | 0.56 / 0.55 |
| Uncus                   | 20, 28, 34, 36, 38  | 1037 / 948  | 6.4 (-34, -13, -28) / 6.2 (36, -16, -28) | 0.62 / 0.60 |
| Transverse Temporal     | 41, 42              | 385 / 356   | 8.4 (-55, -21, 11) / 7.9 (58, -21, 13)   | 0.82 / 0.77 |

***Parietal***

|                          |                   |             |                                        |             |
|--------------------------|-------------------|-------------|----------------------------------------|-------------|
| Precuneus                | 7, 19, 23, 31, 39 | 3141 / 3407 | 5.9 (0, -63, 24) / 6.8 (4, -59, 18)    | 0.57 / 0.66 |
| Postcentral Gyrus        | 2, 3, 40, 43      | 681 / 1393  | 6.3 (-61, -24, 14) / 7.1 (55, -24, 14) | 0.61 / 0.69 |
| Inferior Parietal Lobule | 7, 39, 40         | 1244 / 1807 | 7.0 (-58, -40, 24) / 6.3 (59, -27, 22) | 0.68 / 0.61 |

|                             |                    |             |                                          |             |
|-----------------------------|--------------------|-------------|------------------------------------------|-------------|
| Supramarginal Gyrus         | 40                 | 563 / 800   | 5.9 (-58, -41, 30) / 5.8 (58, -54, 29)   | 0.57 / 0.56 |
| Angular Gyrus               | 39                 | 237 / 356   | 3.8 (-48, -71, 33) / 5.8 (53, -61, 31)   | 0.37 / 0.56 |
| Superior Parietal Lobule    | 7                  | 59 / 296    | 3.4 (-39, -69, 45) / 5.3 (30, -68, 45)   | 0.33 / 0.51 |
| <b><i>Occipital</i></b>     |                    |             |                                          |             |
| Lingual Gyrus               | 17, 18, 19, 30     | 2578 / 2785 | 7.1 (-24, -72, -9) / 6.3 (13, -52, 3)    | 0.69 / 0.61 |
| Middle Occipital Gyrus      | 18, 19, 37         | 2133 / 2607 | 6.0 (-46, -66, -8) / 6.6 (31, -85, 19)   | 0.58 / 0.64 |
| Cuneus                      | 7, 17, 18, 19, 23, | 2193 / 2281 | 6.5 (-9, -61, 9) / 6.7 (12, -59, 8)      | 0.63 / 0.65 |
| Inferior Occipital Gyrus    | 17, 18, 19         | 504 / 711   | 5.4 (-42, -77, -5) / 6.2 (28, -85, -7)   | 0.52 / 0.60 |
| Superior Occipital Gyrus    | 19, 39             | 385 / 326   | 4.4 (-33, -76, 31) / 6.3 (34, -85, 22)   | 0.43 / 0.61 |
| <b><i>Basal Ganglia</i></b> |                    |             |                                          |             |
| Clastrum                    | *                  | 326 / 296   | 7.0 (-33, -23, 8) / 6.2 (34, 0, 8)       | 0.68 / 0.60 |
| Caudate                     | *                  | 59 / 89     | 4.4 (-36, -27, -6) / 4.4 (6, 11, -4)     | 0.43 / 0.43 |
| Lentiform Nucleus           | *                  | 0 / 30      | - / 3.7 (30, -20, 9)                     | - / 0.36    |
| <b><i>Thalamus</i></b>      |                    |             |                                          |             |
|                             | *                  | 859 / 1096  | 6.1 (-3, -10, 2) / 6.1 (3, -10, 1)       | 0.59 / 0.59 |
| <b><i>Cerebellum</i></b>    |                    |             |                                          |             |
| Culmen                      | *                  | 3319 / 3556 | 6.6 (-22, -40, -11) / 6.1 (33, -52, -19) | 0.64 / 0.59 |
| Declive                     | *                  | 3200 / 3289 | 6.1 (-25, -65, -12) / 6.1 (27, -65, -11) | 0.59 / 0.59 |
| Inferior Semi-Lunar         | *                  | 1511 / 1215 | 5.0 (-22, -69, -42) / 5.2 (25, -78, -40) | 0.49 / 0.50 |
| Uvula                       | *                  | 978 / 919   | 4.5 (-4, -64, -33) / 4.9 (6, -70, -32)   | 0.44 / 0.48 |
| Pyramis                     | *                  | 504 / 859   | 3.9 (0, -67, -24) / 4.8 (21, -75, -34)   | 0.38 / 0.47 |
| Cerebellar Tonsil           | *                  | 326 / 770   | 4.2 (-28, -38, -33) / 5.0 (31, -40, -33) | 0.41 / 0.49 |
| Tuber                       | *                  | 296 / 533   | 4.3 (-36, -61, -23) / 4.7 (39, -61, -23) | 0.42 / 0.46 |
| Declive of Vermis           | *                  | 89 / 119    | 5.6 (-1, -69, -15) / 6.0 (1, -69, -13)   | 0.54 / 0.58 |
| Uvula of Vermis             | *                  | 89 / 59     | 4.5 (-1, -67, -33) / 4.5 (1, -64, -33)   | 0.44 / 0.44 |
| Culmen of Vermis            | *                  | 30 / 89     | 4.7 (-1, -66, -8) / 4.9 (6, -61, -1)     | 0.46 / 0.48 |
| Pyramis of Vermis           | *                  | 59 / 59     | 4.5 (-1, -71, -28) / 4.7 (1, -71, -30)   | 0.44 / 0.46 |
| Fastigium                   | *                  | 30 / 59     | 3.3 (-10, -61, -21) / 4.4 (7, -56, -19)  | 0.32 / 0.43 |
| Nodule                      | *                  | 0 / 59      | - / 3.6 (1, -48, -29)                    | - / 0.35    |
| Tuber of Vermis             | *                  | 30 / 30     | 4.4 (-3, -71, -24) / 4.7 (1, -71, -25)   | 0.43 / 0.46 |

| Healthy –<br>Biotype3<br>Probands |                          |                      |             |                                        |             |
|-----------------------------------|--------------------------|----------------------|-------------|----------------------------------------|-------------|
|                                   |                          |                      |             |                                        |             |
|                                   | <b><i>Frontal</i></b>    |                      |             |                                        |             |
|                                   | Medial Frontal Gyrus     | 6, 8, 9, 10, 11, 25, | 2578 / 3615 | 5.5 (-3, 49, -4) / 6.3 (3, 37, -13)    | 0.51 / 0.58 |
|                                   | Inferior Frontal Gyrus   | 9, 10, 13, 44, 45,   | 1600 / 3141 | 5.2 (-39, 22, -4) / 6.0 (43, 19, -3)   | 0.48 / 0.55 |
|                                   | Middle Frontal Gyrus     | 9, 10, 11, 46        | 1689 / 2015 | 4.9 (-30, 34, -14) / 4.8 (43, 13, 27)  | 0.45 / 0.44 |
|                                   | Superior Frontal Gyrus   | 9, 10, 11            | 1156 / 1007 | 5.1 (-27, 52, -4) / 4.7 (13, 55, -8)   | 0.47 / 0.43 |
|                                   | Precentral Gyrus         | 6, 9, 13, 43, 44     | 267 / 859   | 4.1 (-55, -10, 10) / 6.3 (50, -8, 6)   | 0.38 / 0.58 |
|                                   | Paracentral Lobule       | 31                   | 148 / 237   | 4.1 (-6, -17, 44) / 5.3 (7, -15, 44)   | 0.38 / 0.49 |
|                                   | Orbital Gyrus            | 11                   | 59 / 89     | 4.6 (-3, 41, -21) / 5.0 (3, 41, -20)   | 0.42 / 0.46 |
|                                   | Rectal Gyrus             | 11                   | 30 / 89     | 3.9 (-4, 35, -21) / 5.3 (3, 35, -19)   | 0.36 / 0.49 |
|                                   | <b><i>Cingulate</i></b>  |                      |             |                                        |             |
|                                   | Cingulate Gyrus          | 23, 24, 31, 32       | 2489 / 3022 | 5.0 (-9, 18, 34) / 6.2 (10, -14, 41)   | 0.46 / 0.57 |
|                                   | Anterior Cingulate       | 10, 24, 25, 32       | 1719 / 1333 | 5.3 (-4, 52, -1) / 5.8 (3, 47, 0)      | 0.49 / 0.53 |
|                                   | Posterior Cingulate      | 23, 29, 30, 31       | 563 / 1037  | 4.6 (-1, -60, 17) / 5.2 (3, -60, 17)   | 0.42 / 0.48 |
|                                   | <b><i>Insula</i></b>     |                      |             |                                        |             |
|                                   |                          | 13, 22, 47           | 1926 / 2193 | 4.7 (-33, 22, 2) / 6.3 (42, 3, 4)      | 0.43 / 0.58 |
|                                   | <b><i>Temporal</i></b>   |                      |             |                                        |             |
|                                   | Superior Temporal Gyrus  | 13, 21, 22, 38, 41,  | 1926 / 4148 | 4.9 (-55, -8, 6) / 6.5 (50, -6, 3)     | 0.45 / 0.60 |
|                                   | Parahippocampal Gyrus    | 19, 28, 30, 34, 35,  | 1422 / 1778 | 4.9 (-28, 4, -17) / 5.1 (25, 5, -17)   | 0.45 / 0.47 |
|                                   | Middle Temporal Gyrus    | 21, 22, 38           | 30 / 1541   | 3.2 (-50, 6, -23) / 5.1 (49, 0, -26)   | 0.30 / 0.47 |
|                                   | Uncus                    | 20, 28, 34, 36       | 267 / 741   | 4.5 (-28, 1, -19) / 5.8 (28, 5, -19)   | 0.42 / 0.53 |
|                                   | Transverse Temporal      | 41, 42               | 326 / 148   | 4.5 (-50, -24, 11) / 5.0 (56, -18, 12) | 0.42 / 0.46 |
|                                   | Inferior Temporal Gyrus  | 20, 21               | 0 / 207     | - / 4.1 (49, -3, -29)                  | - / 0.38    |
|                                   | Fusiform Gyrus           | 20                   | 0 / 89      | - / 4.4 (49, -3, -24)                  | - / 0.41    |
|                                   | <b><i>Parietal</i></b>   |                      |             |                                        |             |
|                                   | Precuneus                | 23, 31               | 444 / 681   | 4.5 (0, -64, 24) / 5.0 (1, -63, 20)    | 0.42 / 0.46 |
|                                   | Inferior Parietal Lobule | 40                   | 444 / 178   | 4.3 (-52, -43, 23) / 3.8 (53, -27, 23) | 0.40 / 0.35 |
|                                   | Postcentral Gyrus        | 40, 43               | 89 / 178    | 3.9 (-53, -9, 16) / 4.2 (56, -24, 14)  | 0.36 / 0.39 |
|                                   | Supramarginal Gyrus      | 40                   | 30 / 30     | 3.4 (-55, -45, 23) / 3.9 (55, -46, 22) | 0.31 / 0.36 |

***Occipital***

|               |                |           |                                       |             |
|---------------|----------------|-----------|---------------------------------------|-------------|
| Lingual Gyrus | 17, 18, 19, 30 | 237 / 859 | 3.5 (-3, -81, 3) / 4.8 (13, -51, 4)   | 0.32 / 0.44 |
| Cuneus        | 17, 18, 23, 30 | 593 / 622 | 3.8 (-13, -69, 16) / 4.7 (13, -59, 8) | 0.35 / 0.43 |

***Basal Ganglia***

|                   |   |          |                                        |             |
|-------------------|---|----------|----------------------------------------|-------------|
| Clastrum          | * | 178 / 89 | 4.0 (-33, 6, 4) / 3.7 (30, 17, -1)     | 0.37 / 0.34 |
| Caudate           | * | 30 / 30  | 3.6 (-33, -25, -6) / 3.4 (34, -25, -3) | 0.33 / 0.31 |
| Lentiform Nucleus | * | 0 / 30   | - / 3.6 (21, -9, -6)                   | - / 0.33    |

***Cerebellum***

|        |   |          |                                         |             |
|--------|---|----------|-----------------------------------------|-------------|
| Culmen | * | 30 / 237 | 3.4 (-19, -28, -15) / 3.9 (18, -40, -7) | 0.31 / 0.36 |
|--------|---|----------|-----------------------------------------|-------------|

**Gray matter volume reductions in Biotype relative groups vs. healthy subjects****Healthy –  
Biotype1  
Relatives*****Frontal***

|                        |            |            |                                       |             |
|------------------------|------------|------------|---------------------------------------|-------------|
| Medial Frontal Gyrus   | 10, 11, 25 | 1185 / 444 | 4.4 (-3, 26, -13) / 4.4 (3, 31, -13)  | 0.45 / 0.45 |
| Inferior Frontal Gyrus | 11, 13, 47 | 89 / 1067  | 3.9 (-28, 8, -18) / 4.4 (25, 18, -16) | 0.40 / 0.45 |
| Superior Frontal Gyrus | 10         | 237 / 0    | 3.7 (-9, 59, -7) / -                  | 0.38 / -    |
| Middle Frontal Gyrus   | 11         | 30 / 30    | 3.2 (-42, 22, 22) / 3.5 (25, 24, -16) | 0.30 / 0.32 |

***Cingulate***

|                     |                    |            |                                       |             |
|---------------------|--------------------|------------|---------------------------------------|-------------|
| Anterior Cingulate  | 10, 24, 25, 32     | 1511 / 356 | 4.7 (-3, 29, -10) / 4.1 (1, 19, -7)   | 0.43 / 0.38 |
| Posterior Cingulate | 18, 23, 29, 30, 31 | 919 / 770  | 4.2 (-19, -59, 11) / 4.5 (9, -56, 10) | 0.39 / 0.42 |
| Cingulate Gyrus     | 24, 31, 32         | 919 / 296  | 4.8 (-13, -10, 42) / 4.0 (9, -6, 35)  | 0.44 / 0.37 |

***Insula***

|    |         |                     |          |
|----|---------|---------------------|----------|
| 13 | 444 / 0 | 3.7 (-34, 8, 7) / - | 0.34 / - |
|----|---------|---------------------|----------|

***Temporal***

|                         |                     |             |                                          |             |
|-------------------------|---------------------|-------------|------------------------------------------|-------------|
| Parahippocampal Gyrus   | 28, 30, 34, 35, 36, | 1600 / 1837 | 5.9 (-30, -13, -22) / 5.1 (31, -13, -22) | 0.54 / 0.47 |
| Middle Temporal Gyrus   | 20, 21, 38          | 978 / 30    | 5.1 (-42, 2, -23) / 3.2 (49, -11, -11)   | 0.47 / 0.30 |
| Uncus                   | 20, 28, 36          | 593 / 385   | 4.6 (-30, -1, -21) / 3.8 (22, -7, -22)   | 0.42 / 0.35 |
| Superior Temporal Gyrus | 38                  | 593 / 148   | 4.8 (-45, 5, -22) / 3.9 (33, 4, -17)     | 0.44 / 0.36 |
| Fusiform Gyrus          | 20, 37              | 30 / 178    | 4.4 (-42, -3, -23) / 4.1 (27, -34, -15)  | 0.41 / 0.38 |

|                                             |                             |                          |                    |                                          |                                         |             |
|---------------------------------------------|-----------------------------|--------------------------|--------------------|------------------------------------------|-----------------------------------------|-------------|
|                                             | Inferior Temporal Gyrus     | *                        | 59 / 0             | 3.7 (-33, -1, -42) / -                   | 0.38 / -                                |             |
|                                             | <b><i>Parietal</i></b>      |                          |                    |                                          |                                         |             |
|                                             | Precuneus                   | 31                       | 30 / 30            | 3.1 (-10, -65, 18) / 3.5 (6, -73, 22)    | 0.31 / 0.36                             |             |
|                                             | <b><i>Occipital</i></b>     |                          |                    |                                          |                                         |             |
|                                             | Cuneus                      | 18, 30                   | 504 / 504          | 4.3 (-16, -71, 16) / 4.8 (15, -62, 6)    | 0.44 / 0.49                             |             |
|                                             | Lingual Gyrus               | 18, 19                   | 178 / 415          | 3.6 (-13, -52, 5) / 4.4 (15, -58, 4)     | 0.37 / 0.45                             |             |
|                                             | <b><i>Basal Ganglia</i></b> |                          |                    |                                          |                                         |             |
|                                             | Clastrum                    | *                        | 30 / 0             | 3.3 (-30, 3, 11) / -                     | 0.33 / -                                |             |
|                                             | <b><i>Cerebellum</i></b>    |                          |                    |                                          |                                         |             |
|                                             | Culmen                      | *                        | 30 / 119           | 3.2 (-19, -33, -12) / 3.5 (27, -32, -19) | 0.32 / 0.36                             |             |
| <b>Healthy –<br/>Biotype2<br/>Relatives</b> | <b><i>Cingulate</i></b>     |                          |                    |                                          |                                         |             |
|                                             |                             | Posterior Cingulate      | 23, 29, 30, 31     | 0 / 770                                  | - / 4.2 (10, -58, 10)                   | - / 0.40    |
|                                             |                             | <b><i>Temporal</i></b>   |                    |                                          |                                         |             |
|                                             |                             | Parahippocampal Gyrus    | 19, 30, 35, 36, 37 | 59 / 652                                 | 3.6 (-24, -36, -13) / 4.7 (21, -56, -6) | 0.34 / 0.45 |
|                                             |                             | Fusiform Gyrus           | 19, 20, 37         | 504 / 415                                | 4.2 (-43, -56, -17) / 4.5 (24, -63, -7) | 0.40 / 0.43 |
|                                             |                             | Uncus                    | 20                 | 0 / 59                                   | - / 3.6 (34, -19, -27)                  | - / 0.34    |
|                                             |                             | <b><i>Parietal</i></b>   |                    |                                          |                                         |             |
|                                             |                             | Precuneus                | *                  | 0 / 30                                   | - / 3.2 (6, -62, 18)                    | - / 0.30    |
|                                             |                             | <b><i>Occipital</i></b>  |                    |                                          |                                         |             |
|                                             |                             | Lingual Gyrus            | 18, 19             | 267 / 711                                | 4.2 (-9, -78, -9) / 4.6 (21, -60, -6)   | 0.40 / 0.44 |
|                                             |                             | Cuneus                   | 18, 30             | 0 / 119                                  | - / 4.1 (13, -59, 7)                    | - / 0.39    |
|                                             |                             | <b><i>Cerebellum</i></b> |                    |                                          |                                         |             |
|                                             |                             | Declive                  | *                  | 2222 / 2607                              | 4.4 (-9, -58, -17) / 4.4 (9, -65, -13)  | 0.42 / 0.42 |
|                                             |                             | Culmen                   | *                  | 1096 / 2281                              | 4.4 (-9, -53, -18) / 4.8 (25, -36, -16) | 0.42 / 0.46 |

|                     |   |           |                                          |             |
|---------------------|---|-----------|------------------------------------------|-------------|
| Pyramis             | * | 444 / 652 | 4.1 (-24, -74, -28) / 3.9 (25, -70, -27) | 0.39 / 0.37 |
| Uvula               | * | 296 / 652 | 3.9 (-22, -77, -25) / 4.2 (25, -73, -24) | 0.37 / 0.40 |
| Inferior Semi-Lunar | * | 30 / 652  | 3.1 (-39, -63, -36) / 3.7 (31, -64, -35) | 0.30 / 0.35 |
| Tuber               | * | 356 / 504 | 4.0 (-27, -77, -28) / 3.9 (31, -80, -28) | 0.38 / 0.37 |
| Cerebellar Tonsil   | * | 385 / 356 | 3.5 (-43, -56, -35) / 3.6 (27, -66, -33) | 0.33 / 0.34 |
| Declive of Vermis   | * | 89 / 30   | 3.9 (-1, -69, -17) / 3.5 (1, -72, -18)   | 0.37 / 0.33 |
| Culmen of Vermis    | * | 59 / 30   | 3.9 (-3, -66, -8) / 3.9 (3, -66, -8)     | 0.37 / 0.37 |
| Fastigium           | * | 30 / 30   | 3.7 (-7, -61, -20) / 3.5 (10, -49, -20)  | 0.35 / 0.33 |
| Uvula of Vermis     | * | 0 / 30    | - / 3.3 (3, -69, -33)                    | - / 0.31    |

**Healthy –  
Biotype3  
Relatives**

|                         |        |           |                                       |             |
|-------------------------|--------|-----------|---------------------------------------|-------------|
| <b>Frontal</b>          |        |           |                                       |             |
| Inferior Frontal Gyrus  | *      | 0 / 30    | - / 3.6 (28, 7, -15)                  | - / 0.32    |
| <b>Temporal</b>         |        |           |                                       |             |
| Parahippocampal Gyrus   | 28, 34 | 652 / 504 | 4.2 (-28, 2, -18) / 4.4 (28, 3, -18)  | 0.37 / 0.40 |
| Uncus                   | 28, 34 | 178 / 237 | 3.7 (-27, -1, -20) / 3.9 (28, 0, -20) | 0.33 / 0.35 |
| Superior Temporal Gyrus | 38     | 30 / 30   | 3.5 (-31, 5, -18) / 4.0 (31, 6, -18)  | 0.32 / 0.36 |

**Gray matter volume reductions in Biotype relative groups after removing relatives with psychosis-related diagnoses vs. healthy subjects**

**Healthy –  
Biotype1  
Relatives  
(All-Psychosis)**

|                         |            |          |                         |          |
|-------------------------|------------|----------|-------------------------|----------|
| <b>Temporal</b>         |            |          |                         |          |
| Parahippocampal Gyrus   | 28, 34, 35 | 1007 / 0 | 4.5 (-19, -18, -17) / - | 0.46 / - |
| Uncus                   | *          | 119 / 0  | 3.7 (-30, 0, -20) / -   | 0.38 / - |
| Superior Temporal Gyrus | 38         | 89 / 0   | 3.4 (-30, 7, -15) / -   | 0.35 / - |

**Healthy –  
Biotype2  
Relatives  
(All-Psychosis)**

|                       |        |         |                        |          |
|-----------------------|--------|---------|------------------------|----------|
| <b>Temporal</b>       |        |         |                        |          |
| Parahippocampal Gyrus | 19, 36 | 0 / 119 | - / 3.6 (19, -56, -6)  | - / 0.34 |
| Fusiform Gyrus        | 37     | 0 / 59  | - / 3.3 (28, -36, -15) | - / 0.31 |
| <b>Occipital</b>      |        |         |                        |          |
| Lingual Gyrus         | 18, 19 | 0 / 148 | - / 3.5 (13, -58, 0)   | - / 0.33 |

**Cerebellum**



|                                                                 |                         |            |           |                                      |             |
|-----------------------------------------------------------------|-------------------------|------------|-----------|--------------------------------------|-------------|
|                                                                 | Culmen                  | *          | 0 / 741   | - / 4.2 (24, -37, -15)               | - / 0.40    |
|                                                                 | Declive                 | *          | 0 / 119   | - / 3.3 (18, -55, -12)               | - / 0.31    |
| <b>Healthy –<br/>Biotype3<br/>Relatives<br/>(All-Psychosis)</b> | <b>Frontal</b>          |            |           |                                      |             |
|                                                                 | Inferior Frontal Gyrus  | *          | 0 / 30    | - / 4.1 (28, 7, -15)                 | - / 0.37    |
|                                                                 | <b>Temporal</b>         |            |           |                                      |             |
|                                                                 | Parahippocampal Gyrus   | 28, 34, 38 | 770 / 741 | 4.8 (-27, 2, -18) / 5.1 (28, 3, -18) | 0.43 / 0.46 |
|                                                                 | Uncus                   | 28, 34     | 207 / 356 | 4.3 (-18, 1, -19) / 4.8 (16, 1, -19) | 0.39 / 0.43 |
|                                                                 | Superior Temporal Gyrus | 38         | 30 / 59   | 3.7 (-33, 2, -18) / 4.6 (31, 6, -18) | 0.33 / 0.41 |

\* Coordinates for peak  $t$  values are reported based of Group ICA for fMRI Toolbox, GIFT1.3i. All outcomes are reported at  $p = .05$ , using FWE cluster-level correction, based on an initial voxel threshold set to  $p = .001$ , uncorrected. † Effect size: Cohen's  $d$  derived from  $t$  distribution statistics =  $t \cdot \{ (n_1 + n_2) / \sqrt{n_1 + n_2 - df} \sqrt{n_1 n_2} \}$  where  $t$  =  $t$  statistic;  $n_1$  and  $n_2$  = sample sizes;  $df$  = degree of freedom; 0.2 = small, 0.5 = medium, 0.8 = large

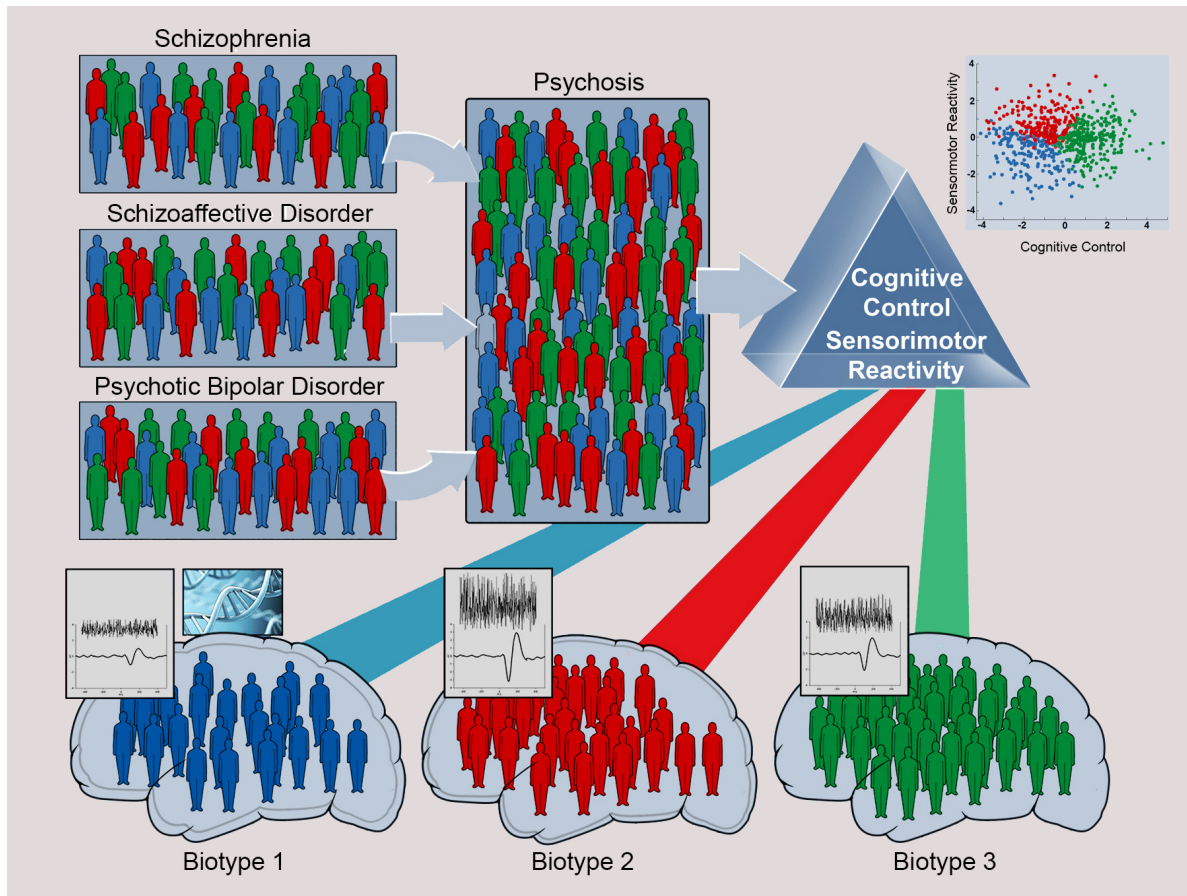

Supplementary Figure 1: Creating Neurobiologically Distinct Psychosis Biotypes. Psychosis is a defining characteristic of Schizophrenia, Schizoaffective Disorder, and Psychotic Bipolar Disorder, all pathophysiologically complex syndromes. These clinical syndromes were not distinguishable by our extensive biomarker panel. Psychosis subjects, therefore, were combined into a single group, independent of DSM diagnosis, and biomarker variables were used to define subgroups with shared neurobiological variance. Two biomarker dimensions, ‘cognitive control’ and ‘sensorimotor reactivity’, provided a means for creating biomarker-defined subgroups (called psychosis *Biotypes*). Biotype-1, -2, and -3, had distinctive neurobiological characteristics, including on variables not used in their definition (called external validators). Biotype-1 cases were fewest in number, had low grey matter volume, significant neurobiological impairment, high numbers of clinically affected relatives, and poor psychosocial functioning. Biotype-2 cases had high neural reactivity, modestly small grey matter volumes, and more modest but still significant cognitive impairment. Biotype-3 cases were most numerous, had nearly normal cognition and neural reactivity, lowest numbers of clinically affected relatives, and the best psychosocial functioning. Neural characteristics as they segregate in these groups could be the basis for distinct molecular and therapeutic targets.

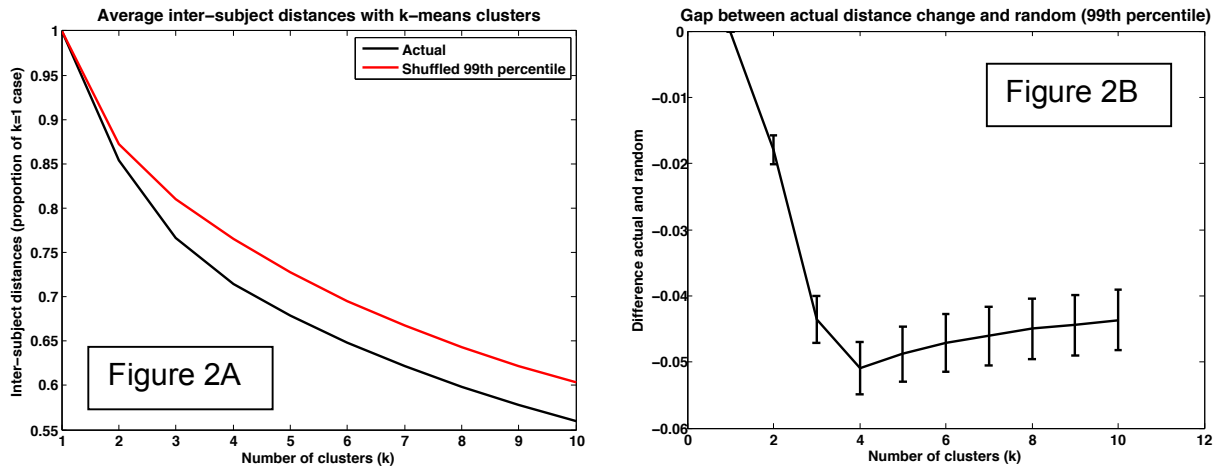

Supplementary Figure 2: Gap Statistic Results. The gap statistic provided one means for estimating the number of clusters in our data prior to implementing the *k*-means algorithm. Figure 1A shows differences between the pooled within-cluster sums of squares as a function of the number of requested clusters for the actual (black line) and null (red line) distributions. Functions are plotted for each distribution as a proportion of the 1 cluster (no subgroups) case. Figure 1B shows the gap function (the difference between the actual and null distribution functions), including the standard errors of the within cluster sums of squares at each requested cluster number. Although the peak was at 4 clusters, that gap value did not significantly differ from the 3-cluster case, so the latter most parsimoniously described the number of subgroups given or data.

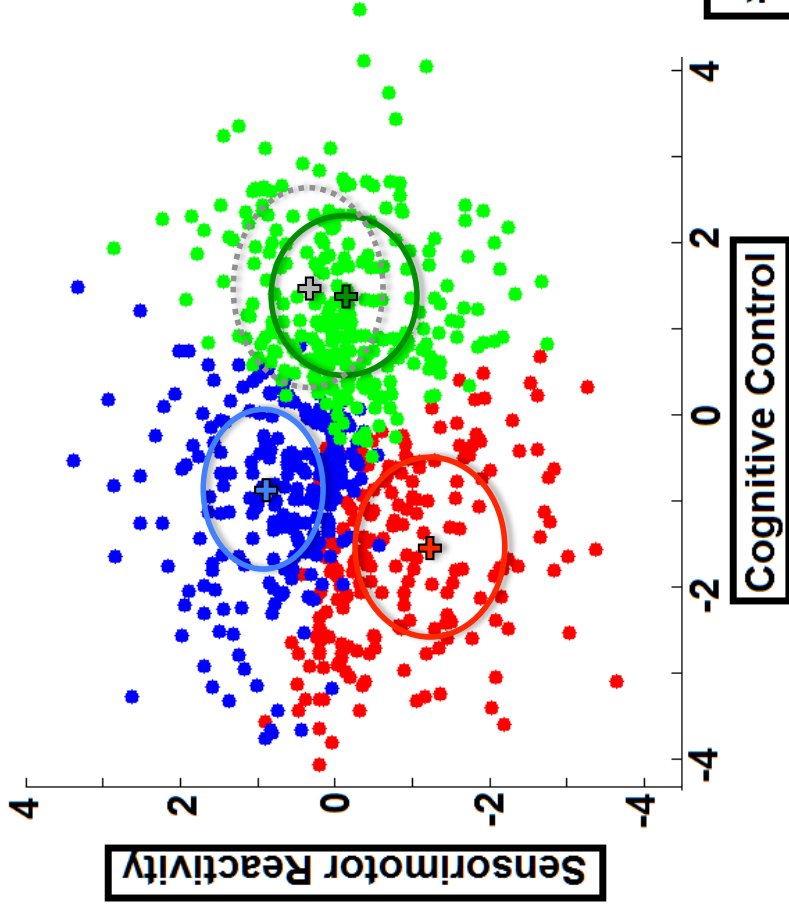

Supplementary Figure 3b: Sensorimotor Reactivity by Cognitive Control as a Function of DSM diagnosis. Each dot indicates the location of an individual in this bivariate biomarker space. (light gray=schizophrenia (SZ), medium gray=schizoaffective disorder (SZAff), black=bipolar disorder with psychosis (BDP)). The gray scale coded crosses and ellipsoids show the centroids and  $\pm 1$  SD for each DSM Diagnosis.

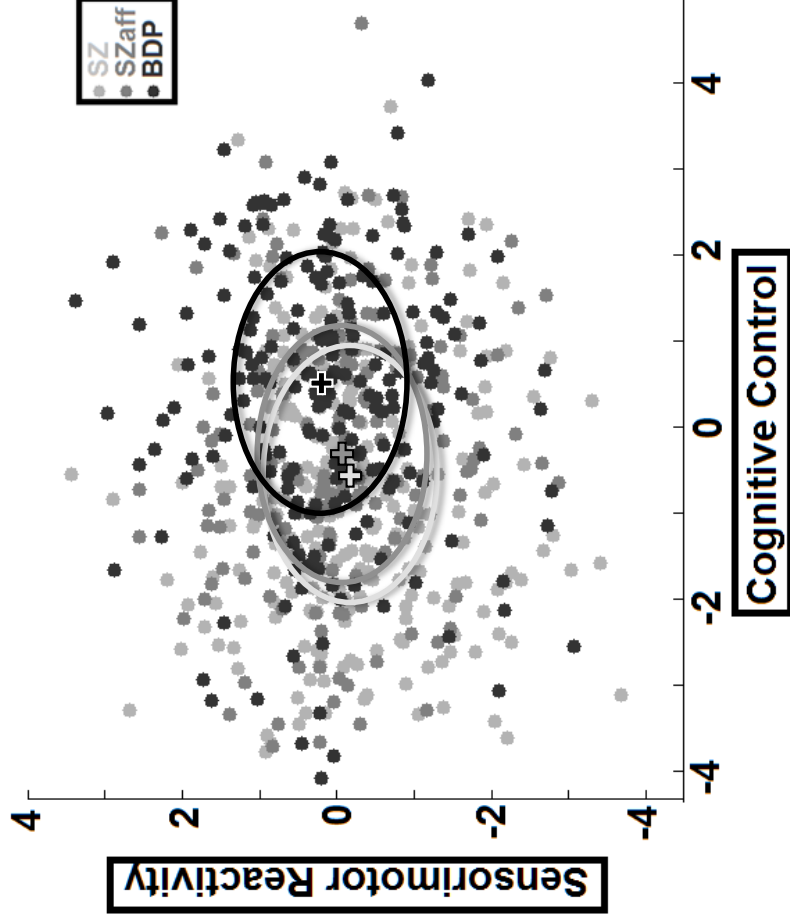

Supplementary Figure 3a: Sensorimotor Reactivity by Cognitive Control as a Function of Biotype. Each dot indicates the location of an individual in this bivariate biomarker space. (red=Biotype-1, blue=Biotype-2, green=Biotype-3). The color coded crosses and ellipsoids show the centroids and  $\pm 1$  SD for each Biotype. The gray cross and ellipse show the same values for the healthy group

**Supplementary Figure 4: Relative Group Comparisons on Discriminant Functions.** Comparisons between healthy persons and biological relatives as a function of their probands' Biotype on cognitive control and sensorimotor reactivity. Relatives are subdivided within Biotype according to their clinical diagnoses (all relatives, then relatives minus psychosis cases, then relatives minus psychosis and personality disorder (PD) cases). There are three important points: (i) Clinically affected relatives were more abnormal, excluding them did not eliminate relatives' differences from healthy persons; (ii) Biotype-1, and to a lesser extend Biotype-2, relatives seem to possess constitutional predisposition to cognitive control deviation; (iii) Biotype-3 relatives appear largely normal on these functions.

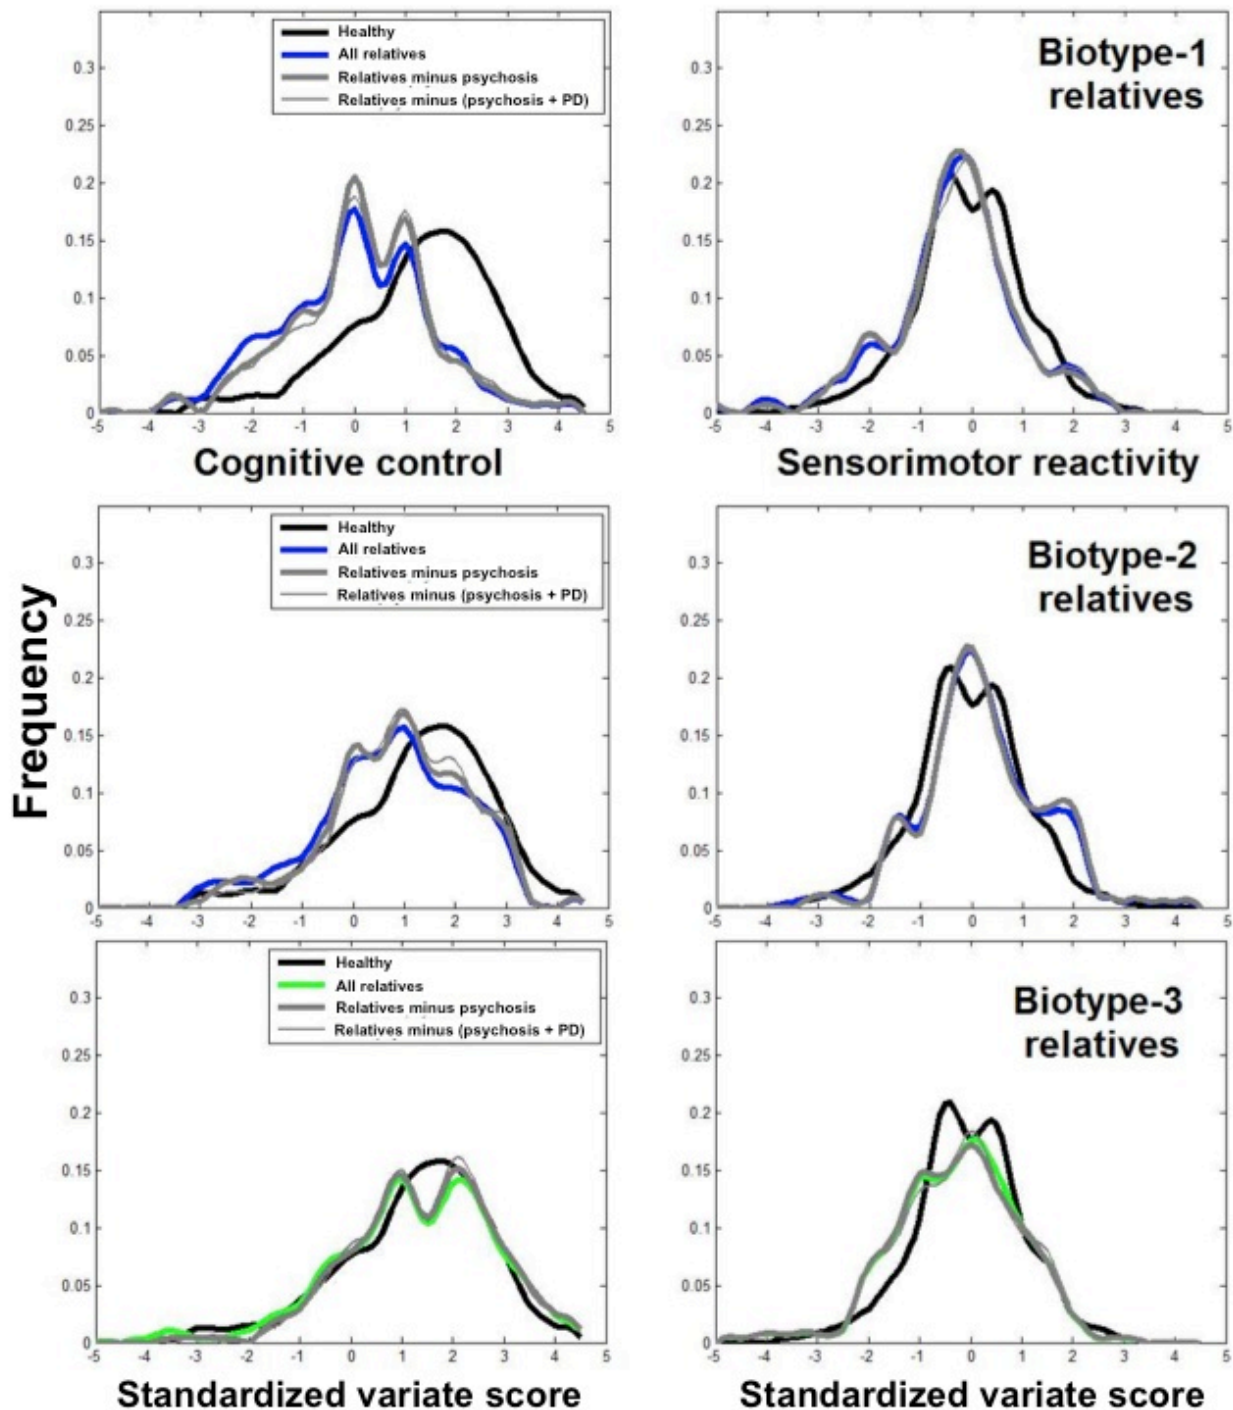

Supplement: appi.ajp.2015.14091200.ds001.pdf [file appi.ajp.2015.14091200.ds001.pdf]
