# Supplementary material for: Identification of Distinct Psychosis Biotypes Using Brain-Based Biomarkers
Source: Atypon-hosted journal article supplement (doi:10.1176/appi.ajp.2015.14091200), 2015-12-10
Supplement: appi.ajp.2015.14091200.Correction.pdf [file appi.ajp.2015.14091200.Correction.pdf]

## **CORRECTION**

In the article “Identification of Distinct Psychosis Biotypes Using Brain-Based Biomarkers” by Brett A. Clementz et al. (doi: 10.1176/appi.ajp.2015.14091200), published online on Dec. 7, 2015, financial disclosures of one of the authors were omitted. The disclosures paragraph should read, “Dr. Keshavan has received a grant from Sunovion and is a consultant to Forum Pharmaceuticals. Dr. Sweeney has served as a consultant to Takeda, Roche, and Lilly. Dr. Tamminga is a Deputy Editor of the Journal; her financial disclosures appear in the April 2015 issue. The other authors report no financial relationships with commercial interests.” This correction was made and the article was reposted on December 14, 2015.
