# Supplementary material for: Identification of Distinct Psychosis Biotypes Using Brain-Based Biomarkers
Source: Atypon-hosted journal article supplement (doi:10.1176/appi.ajp.2015.14091200), 2015-12-10
Supplement: appi.ajp.2015.14091200.ds002.pdf [file appi.ajp.2015.14091200.ds002.pdf]

 


Psychiatry Online
